# Supplementary material for: Constructing TiO2 nanotube arrays with oxygen vacancies on a Cu mesh to enable homogeneous Li deposition towards a long-life Li metal anode
Source: Royal Society of Chemistry journal article supplement (doi:10.1039/d4nj00114a), 2024-01-01
Supplement: d4nj00114a1.pdf [file d4nj00114a1.pdf]

## Supplementary Information

Constructing TiO<sub>2</sub> nanotube arrays with oxygen vacancies on Cu mesh to  
enable homogeneous Li deposition towards long-life Li metal anode

Yujue Wang<sup>a</sup>, Xiaoping Xian<sup>b</sup>, Yilin Wang<sup>b</sup>, Yong Guo<sup>c</sup>, Dan Xiao<sup>a,c,\*</sup>

<sup>a</sup> *Institute of Advanced Study, Chengdu University, Chengdu 610106, China*

<sup>b</sup> *School of Mechanical Engineering, Chengdu University, Chengdu 610106, China*

<sup>c</sup> *College of Chemistry, Sichuan University, Chengdu 610065, China*

\* Corresponding authors at: Institute of Advanced Study, Chengdu University, Chengdu 610106, China and College of Chemistry, Sichuan University, Chengdu 610065, China (D. Xiao).

E-mail addresses: xiaodan@scu.edu.cn (D. Xiao).

Detailed descriptions for DFT binding energy analysis:

The difference in lithiophilicity of TNT or Cu was studied by using the binding energy analysis method based on density functional theory (DFT). In the DMol3 module of Materials Studio software, we use general gradient approximation (GGA) [3, 4] and the Perdew-Burke-Ernzerhof (PBE) exchange-correlation functional for first principles calculations. Double numeric with the polarization (DNP) function is used in the calculation. The convergence tolerance quality of geometric optimization is set to fine, the energy is set to  $1 \times 10^{-5}$  Ha, the maximum force is set to  $0.002 \text{ Ha } \text{\AA}^{-1}$ , and the maximum displacement is set to  $0.005 \text{ \AA}$ . The TNT model and Cu model are allowed to interact with Li. The binding energy is calculated by the following equation:

$$E_{b,TNT-Li} = E_{total,TNT-Li} - E_{TNT} - E_{Li}$$

$$E_{b,Cu-Li} = E_{total,Cu-Li} - E_{Cu} - E_{Li}$$

where  $E_{b,TNT-Li}$  and  $E_{b,Cu-Li}$  are the binding energies of  $\text{Li}^+$  with TNT and Cu, respectively,  $E_{total,TNT-Li}$  and  $E_{total,Cu-Li}$  represent the overall energy of the TNT or Cu model combined with  $\text{Li}^+$ ,  $E_{TNT}$  and  $E_{Cu}$  represent the energies of TNT and the Cu model, respectively, and  $E_{Li}$  represents the energy of  $\text{Li}^+$ .

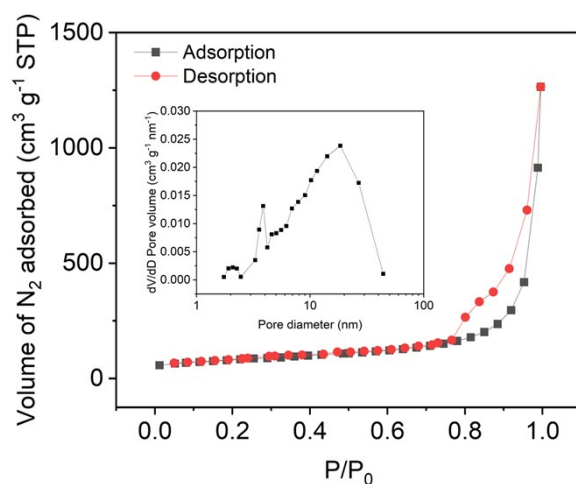

Figure S1. Isotherm of  $N_2$  adsorption/desorption on TNT. Inset: pore size distribution (BJH desorption) of TNT.

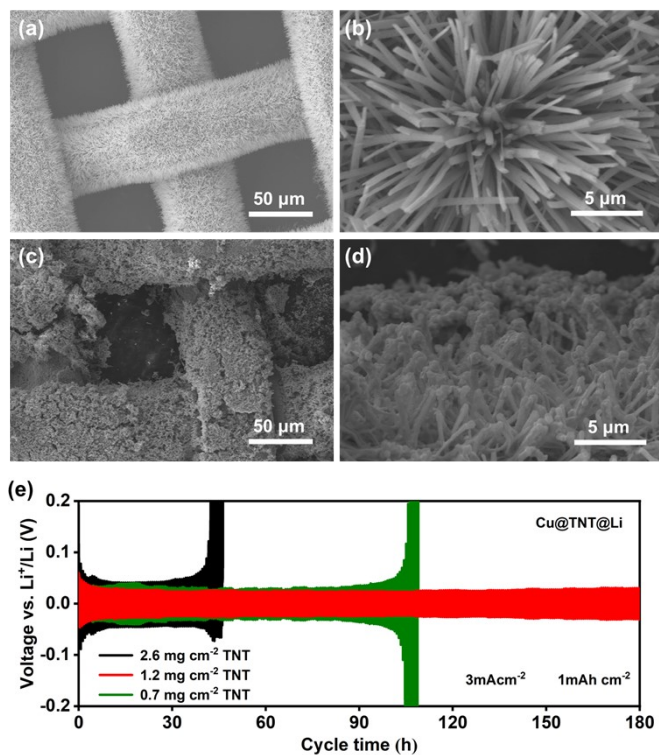

Figure S2. (a-d) SEM images of Cu@TNT electrodes with different TNT loadings: (a, b)  $0.7 \text{ mg cm}^{-2}$ , (c, d)  $2.6 \text{ mg cm}^{-2}$ ; (e) galvanostatic plating/stripping cycling performance of Cu@TNT@Li symmetric cells with different TNT loadings under current density of  $3 \text{ mA cm}^{-2}$  in ether-based electrolyte.

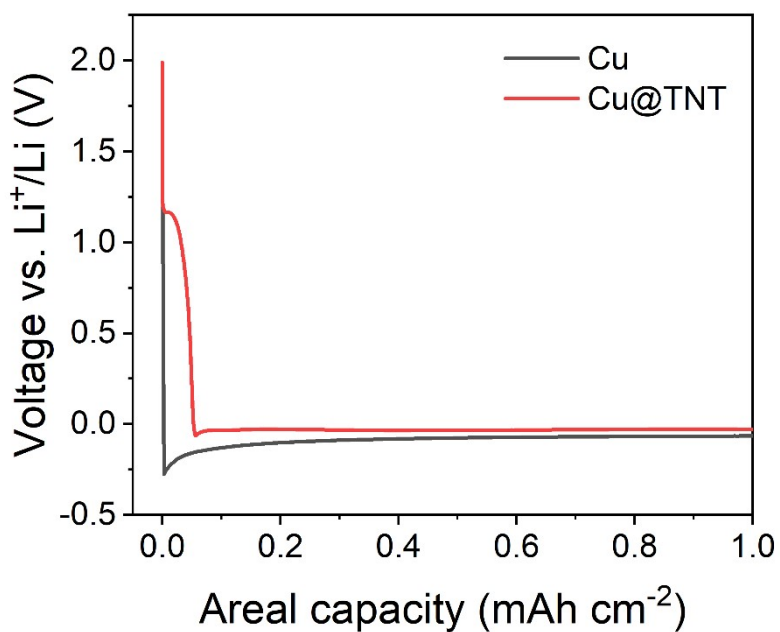

Figure S3. Comparison of the initial Li deposition curves of Cu@TNT and bare

Cu mesh under  $1 \text{ mA cm}^{-2}$ .

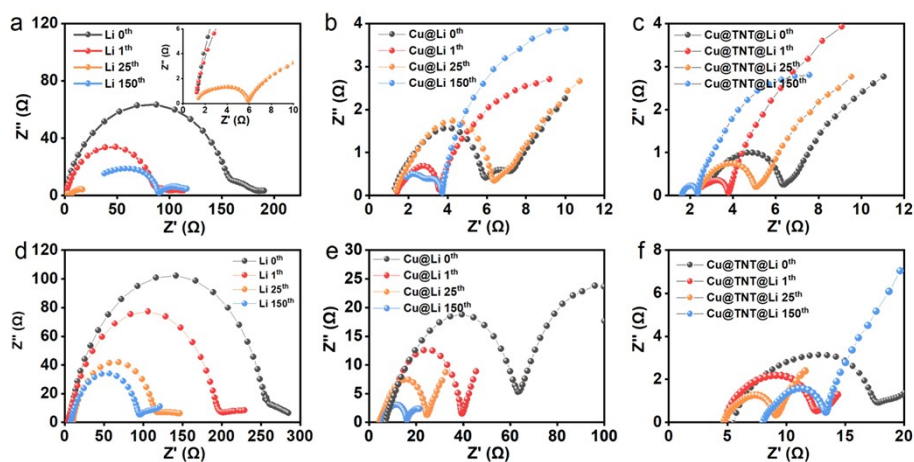

Figure S4. The Nyquist plots of different symmetric cells at different cycles in

(a-c) ether-based electrolyte and (d-f) carbonate-based electrolyte.

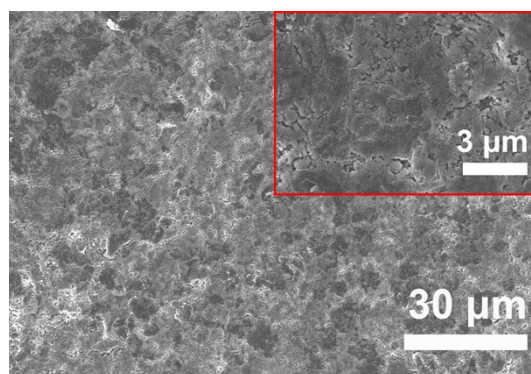

Figure S5. SEM image of Cu@TNT@Li electrode after 200 cycles in symmetric cell

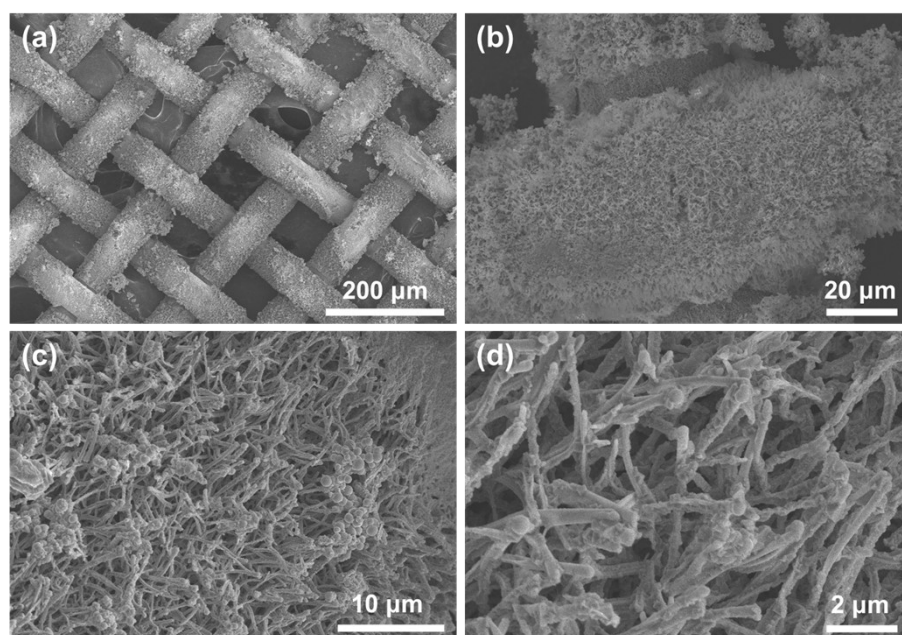

Figure S6. SEM of Cu@TNT after 200 h of plating/stripping cycling at the stripped state.

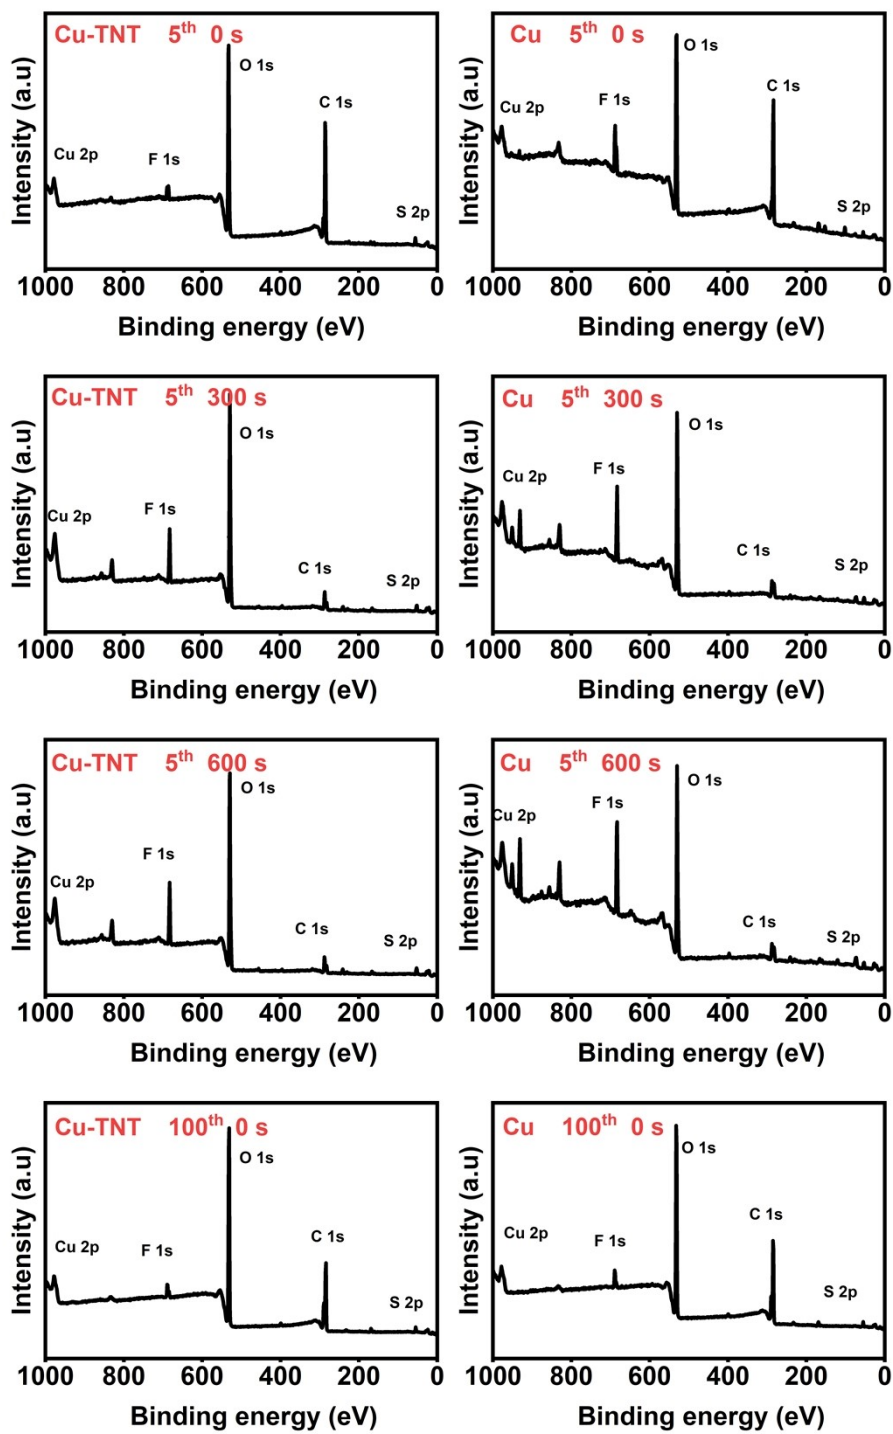

Figure S7. Survey spectra at different etching times or different cycle numbers.

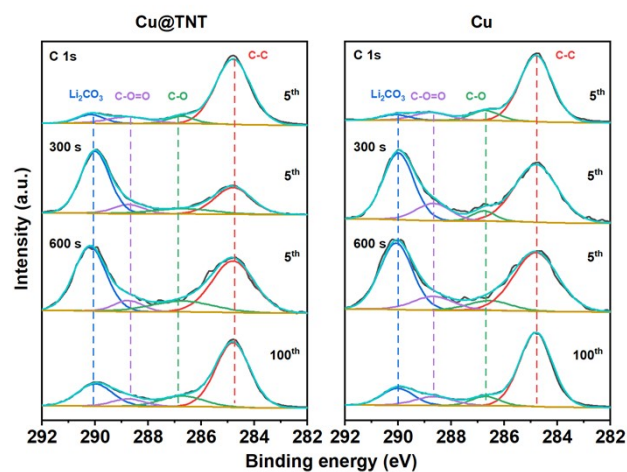

Figure S8. The C 1s spectra of surface SEI on Cu@TNT and bare Cu electrodes taken after 5 cycles and Ar etching for 0 s, 300 s and 600 s, as well as the spectra taken after 100 cycles without Ar etching.

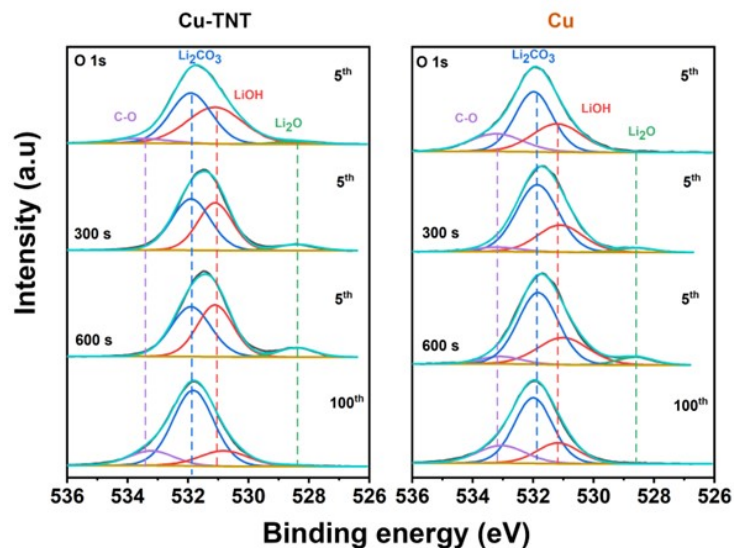

Figure S9. The O 1s spectra of surface SEI on Cu@TNT and bare Cu electrodes taken after 5 cycles and Ar etching for 0 s, 300 s and 600 s, as well as the spectra taken after 100 cycles without Ar etching.

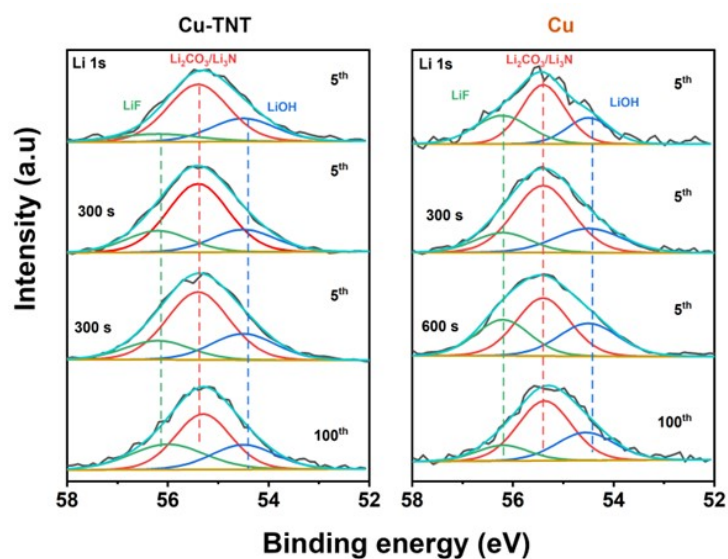

Figure S10. The Li 1s spectra of surface SEI on Cu@TNT and bare Cu electrodes taken after 5 cycles and Ar etching for 0 s, 300 s and 600 s, as well as the spectra taken after 100 cycles without Ar etching.



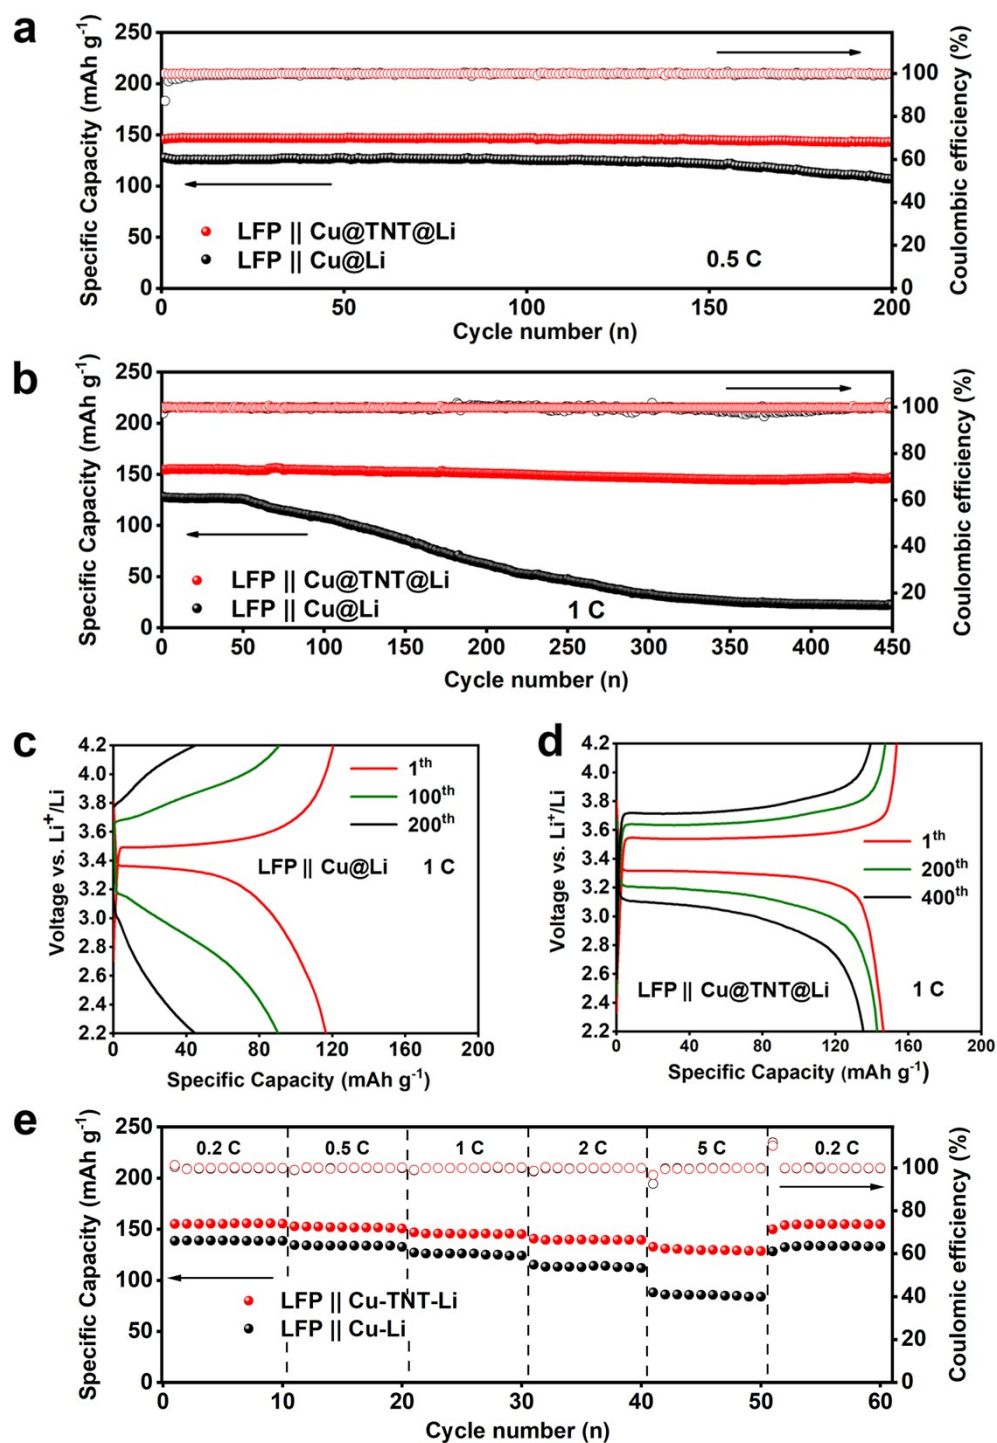

Figure S11. The full cell test results using carbonate-based electrolyte: (a, b) cycling stability of different full cells at (a) 0.5 C and (b) 1 C, (c, d) GCD curves of different full cells at 1 C, (e) rate capability of different full cells.

Table S1 Comparison of full cell cycling stability to other related reported works.

| Anode                                     | Areal capacity of Li          | Areal capacity of cathode                     | Electrolyte                                                   | Cycling stability of full cell                |
|-------------------------------------------|-------------------------------|-----------------------------------------------|---------------------------------------------------------------|-----------------------------------------------|
| Cu@TNT@Li<br>(This work)                  | 4 mAh cm <sup>-2</sup>        | 1.5 mAh cm <sup>-2</sup><br>(LFP)             | 1 M TFSI in<br>DOL/DME (1:1 vol)<br>with 1% LiNO <sub>3</sub> | 91.87% after<br>350 cycles at 1<br>C          |
| CL-<br>matrix@Li@Li <sub>2</sub><br>O [1] | 3 mAh cm <sup>-2</sup>        | 0.85 and 2.1<br>mAh cm <sup>-2</sup><br>(LFP) | 1 M TFSI in<br>DOL/DME (1:1 vol)<br>with 1% LiNO <sub>3</sub> | 90.0% after 150<br>cycles at 0.5 C            |
| TiO <sub>2</sub> /ZnO/Li [2]              | ~30.7 mAh<br>cm <sup>-2</sup> | ~3.58 mAh cm <sup>-2</sup><br>(LFP)           | 1 M TFSI in<br>DOL/DME (1:1 vol)                              | 95% retention<br>after 300 cycles<br>at 0.5 C |
| Li/DDTC/Cu[3]                             | 2 mAh cm <sup>-2</sup>        | 0.8 mAh cm <sup>-2</sup><br>(LFP)             | 1 M TFSI in<br>DOL/DME (1:1 vol)<br>with 2% LiNO <sub>3</sub> | 83% retention<br>after 300 cycles<br>at 1 C   |
| Ag@CMFs-Li<br>[4]                         | 6 mAh cm <sup>-2</sup>        | 0.68 mAh cm <sup>-2</sup><br>(LFP)            | 1 M TFSI in<br>DOL/DME (1:1 vol)<br>with 2% LiNO <sub>3</sub> | 96% retention<br>after 250 cycles<br>at 1 C   |
| H-CM@Li [5]                               | 6 mAh cm <sup>-2</sup>        | ~2.04 mAh cm <sup>-2</sup><br>(LFP)           | 1 M TFSI in<br>DOL/DME (1:1 vol)<br>with 1% LiNO <sub>3</sub> | 92% retention<br>after 275 cycles<br>at 1 C   |
| M-CuO@Cu-Li<br>[6]                        | 3 mAh cm <sup>-2</sup>        | 0.51 mAh cm <sup>-2</sup><br>(LFP)            | 1 M TFSI in<br>DOL/DME (1:1 vol)<br>with 1% LiNO <sub>3</sub> | 88% retention<br>after 300 cycles<br>at 1 C   |

Table S2 Comparison of full cell performances to other energy storage systems.

| System                         | Classification           | Full-cell average plateau | Cycling stability of full cell                          |
|--------------------------------|--------------------------|---------------------------|---------------------------------------------------------|
| LFP  Cu@TNT@Li<br>(This work)  | Lithium-metal<br>battery | 3.4 V                     | 91.87% after 350 cycles at 1 C                          |
| LFP  SSBCN [7]                 | Lithium-metal<br>battery | 3.2 V                     | 92.7% after 600 cycles at 1 C                           |
| KVPO <sub>4</sub> F  PTCDI [8] | Potassium-ion<br>battery | 1.95 V                    | 75% after 10000 cycles at 500 mA g <sup>-1</sup>        |
| KMnHCF  PTCDI [9]              | Potassium-ion<br>battery | 1.35 V                    | 82.5% after 6500 cycles at 1500 mA g <sup>-1</sup>      |
| T-PB  T-FeP [10]               | Sodium-ion<br>battery    | 2.25 V                    | 96.8% retention after 450 cycles at 1 A g <sup>-1</sup> |
| NVP  CMT@Bi-C<br>[11]          | Sodium-ion<br>battery    | 3.1 V                     | 90.3% retention after 700 cycles at 1 A g <sup>-1</sup> |

## References

- [1] Z. Gong, C. Lian, P.F. Wang, K. Huang, K. Zhu, K. Ye, J. Yan, G.L. Wang, D.X. Cao, Lithiophilic Cu-Li<sub>2</sub>O matrix on a Cu collector to stabilize lithium deposition for lithium metal batteries, *Energy & Environmental Materials*, 2022, 5(4), 1270-1277.
- [2] Z.G. Cao, Y.B. Yang, J.L. Qin, J.Y. He, Z.X. Su, 3D TiO<sub>2</sub>/ZnO hybrid framework: stable host for lithium metal anodes, *Chemical Engineering Journal*, 2022, 427, 132026.
- [3] Y.J. Wang, Y. Meng, Y. Guo, D. Xiao, Achieving a dendrite-free lithium metal anode through lithiophilic surface modification with sodium diethyldithiocarbamate, *Inorganic Chemistry Frontiers*, 2022, 9, 6498-6509.
- [4] Y.J. Fang, S.L. Zhang, Z.P. Wu, D.Y. Luan, X.W. Lou, A highly stable lithium metal anode enabled by Ag nanoparticle-embedded nitrogen-doped carbon macroporous fibers, *Science Advances*, 2021, 7, eabg3626.
- [5] L.Y. Ruan, X.Y. Qin, K. Lin, Z.J. Yang, Q.C. Cai, T. Li, F.T. Wu, F.Y. Kang, B.H. Li,

TiO<sub>2</sub>/Cu<sub>2</sub>O heterostructure enabling selective and uniform lithium deposition towards stable lithium metal anodes, *Nano Research*, 2023, 16, 4917-4925.

[6] Y.H. Liu, Y.F. Li, Z.Z. Du, C. He, J.X. Bi, S.Y. Li, W.Q. Guan, H.F. Du, W. Ai, Integrated gradient Cu current collector enables bottom-up Li growth for Li metal anodes: role of interfacial structure, *Advanced Science*, 2023, 10, 2301288.

[7] B.X. Shen, N. Fu, Y.W. Chen, W. Shao, Y.R. Yan, J. Huang and Z.L. Yang, Micron SiO<sub>x</sub> encapsulated into amorphous B, N Co-doped carbon nanotube network for high-capacity and long-durable Li-ion half/full batteries, *Chemical Engineering Journal*, 2023, 455, 140820.

[8] M.T. Xia, H.W. Fu, K.R. Lin, A.M. Rao, L.M. Cha, H. Liu, J. Zhou, C.X. Wang and B.A. Lu, Hydrogen-bond regulation in organic/aqueous hybrid electrolyte for safe and high-voltage K-ion batteries, *Energy & Environmental Science*, 2024, 17, 1255.

[9] J.M. Ge, L. Fan, A.M. Rao, J. Zhou and B.A. Lu, Surface-substituted Prussian blue analogue cathode for sustainable potassium-ion batteries, *Nature Sustainability*, 2022, 5, 225-234.

[10] M.W. Jiang, L.B. Ren, Z.D. Hou, W. Hua, D. Lei, Y.J. Cao, Y. Zhang and J.G. Wang, A superior sodium-ion battery based on tubular Prussian blue cathode and its derived phosphide anode, *Journal of Power Sources*, 2023, 554, 232334.

[11] B.H. Park, S.Y. Lee, D.Y. Han, H.K. Jiang, D.G. Seong, J.K. Yoo, S.J. Park, Y.S. Oh and J.G. Ryu, Multiscale hierarchical design of bismuth-carbon anodes for ultrafast-charging sodium-ion full battery, *Applied Surface Science*, 2023, 614, 156188.
